# Supplementary material for: Submicrometer-thick b-oriented Fe–silicalite-1 membranes: microwave-assisted fabrication and pervaporation performances
Source: Royal Society of Chemistry journal article supplement (doi:10.1039/c6ra23327a), 2016-01-01
Supplement: c6ra23327a1.pdf [file c6ra23327a1.pdf]

## Supplementary Information

**Submicrometer-thick *b*-oriented Fe-silicalite-1 membranes:**

**Microwave-assisted fabrication and pervaporation performances**

Chen Zhao, Xiufeng Liu, Baoquan Zhang\*

*State Key Laboratory of Chemical Engineering, School of Chemical Engineering and Technology, Tianjin University, Tianjin 300072, China*

\*Corresponding author. Tel.: +86-22-85356517; fax: +86-22-87898959. E-mail address: bqzhang@tju.edu.cn

## Experimental

### Materials

All the chemical reagents in the experiment were used without further purification. Tetraethyl orthosilicate (TEOS, 98.0%) was purchased from Tianjin Kewei Chemical Co., Ltd. Chitosan (medium molecular weight) was offered by Sigma-Aldrich company, USA. Tetrapropylammonium hydroxide (TPAOH, 20%), HF (40%), ethanol (99.7%), and Ferric nitrate ( $\text{Fe}(\text{NO}_3)_3$ , 98.5%) were supplied by Tianjin Guangfu Research Institute of Fine Chemicals. The deionized water (DI water) with a resistivity of 18.2 M $\Omega$  was produced by a water purifier (Ulupure-II-10 T, Chengdu Ultrapure Technology Co., Ltd.), and used throughout the study. The glass plate and porous  $\alpha$ - $\text{Al}_2\text{O}_3$  disk ( $\phi$  20 mm  $\times$  2 mm) were used as the membrane substrates. The manufacture and treatment of porous  $\alpha$ - $\text{Al}_2\text{O}_3$  disk was reported previously.<sup>1</sup>

### Synthesis of Fe-silicalite-1 seed

The coffin-shape Fe-silicalite-1 crystal seeds ( $0.6 \times 0.3 \times 0.06 \mu\text{m}^3$ ) were synthesized in fluoride media at near neutral pH, as similar with the described elsewhere.<sup>2</sup> The molar ratio of the solid clear gel was 1 $\text{SiO}_2$ : 0.5 TPAOH: 0.01  $\text{Fe}(\text{NO}_3)_3$ : 0.5 HF: 60  $\text{H}_2\text{O}$ . The synthesis gel was first prepared by mixing  $\text{SiO}_2$ , TPAOH,  $\text{Fe}(\text{NO}_3)_3$  and deionized water and stirring for 24 h. Then HF was quickly added to the synthesis mixtures under stirring. Finally, the obtained gel was transferred into a Teflon-lined autoclave, followed by the hydrothermal reaction with stirring at 180 °C for 5 d. The collected Fe-silicalite-1 crystals were thoroughly washed with a copious amount of deionized distilled water and dried at 120 °C overnight.

### Synthesis of Fe-silicalite-1 seed layer and membrane

The manual assembly of Fe-silicalite-1 layers both on the glass plate and the porous  $\alpha$ - $\text{Al}_2\text{O}_3$  disk supported chitosan films were performed according to our previous studies.<sup>3, 4</sup> Before the secondary growth of Fe-silicalite-1 zeolite membranes, the seeded supports were calcined at 550 °C for 5 h with the heating and cooling rates of 0.5 °C  $\text{min}^{-1}$  to decompose the chitosan layer. Then the seed layer on the support was held by a self-made Teflon holder with the seed layer upwards in the synthesis solution with the molar composition of 1 TEOS: 0.2 TPAOH: 0.01  $\text{Fe}(\text{NO}_3)_3$ : 800  $\text{H}_2\text{O}$ . The hydrothermal synthesis was carried out in a microwave oven (MDS-6, Sineo Microwave Chemical Technology Co., Ltd) at 150 °C for 2 h. After synthesis, the membrane was washed with DI water and dried in vacuum at 95 °C. The templates were removed in a hydrogen atmosphere at 350 °C for 10 h with the heating and cooling rates of 0.5 °C  $\text{min}^{-1}$  according to our group previous publication.<sup>5</sup>

### Characterization

Fe-silicalite-1 seed layers and membranes were characterized by field emission scanning electron microscopy (FE-SEM, FEI Nanosem 430) at an acceleration voltage range of 10~15 kV and X-ray diffraction (XRD, Rigaku D/max 2500v/pc diffractometer) using Cu K $\alpha$  radiation ( $\lambda_1=0.1541 \text{ nm}$  and  $\lambda_2=0.1544 \text{ nm}$  at 40 kV and 200 mA). Diffuse reflectance UV-visible spectra was measured in

a range of 200-600 nm on a Thermo Evolution 300 BB spectrophotometer to investigate the nature of the extra-framework iron species. The functional groups were detected by diffuse-reflectance FT-IR (DR-FT-IR, Nicolet 6700). The hydrophobicity of Fe-silicalite-1 zeolite membranes was studied by contact-angle measurements (CA, OCAH 20). The permoporometry method to measure the defect size distribution of the synthesized Fe-silicalite-1 membrane was obtained by the self-made zeolite membrane evaluation device, a detailed description of which has been given elsewhere.<sup>6,7</sup>

### **N<sub>2</sub> permeation test and Pervaporation**

The N<sub>2</sub> permeation test of the *b*-oriented Fe-silicalite-1 zeolite membrane was performed between 0.05 - 0.40 MPa and at 25 °C based on the concentration gradient method similar to that previously reported.<sup>8,9</sup> The permeance is defined as  $f = F/L = Q/S(P_h - P_l)$ , where  $f$  is the permeance (mol m<sup>-2</sup> s<sup>-1</sup> Pa<sup>-1</sup>),  $F$  the permeability (mol m m<sup>-2</sup> s<sup>-1</sup> Pa<sup>-1</sup>),  $L$  the membrane thickness (m),  $Q$  the molar gas flow rate (mol s<sup>-1</sup>),  $S$  the membrane area (m<sup>2</sup>), and  $P_h$  and  $P_l$  are the upstream and downstream pressure (Pa), respectively.

The pervaporation experiment was conducted with a batch system as described elsewhere.<sup>10</sup> The permeation side was kept at vacuum (133 Pa). The flux was calculated by the weight of the condensed permeated species and the concentration:  $J=W/At$ , where  $W$  refers to the weight of permeate (kg),  $A$  is the membrane area (m<sup>2</sup>),  $t$  is the duration (h) of the sample collection. The feed and permeate concentrations of ethanol aqueous solution were measured by a gas chromatograph (GC, Varian CP-3380). The separation factor ( $\alpha$ ) was determined by the equation  $\alpha_{A/B} = (Y_A/Y_B)/(X_A/X_B)$ , where  $X_A$ ,  $X_B$  and  $Y_A$ ,  $Y_B$  are the weight fractions of ethanol (A) and water (B) in the feed and permeate sides, respectively.

### **Supplementary Figure**

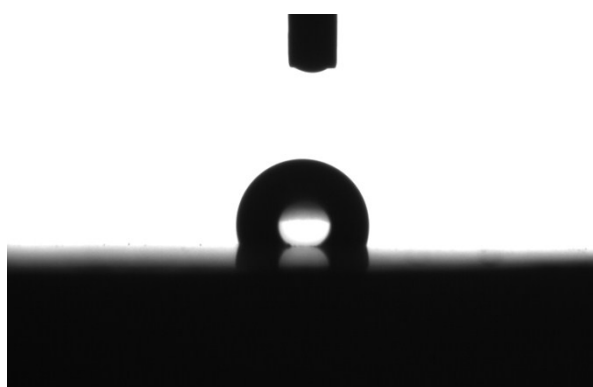

Fig. S1 The contact angle of the Fe-silicalite-1 membrane on  $\alpha$ -Al<sub>2</sub>O<sub>3</sub> after template removal

### **Notes and references**

- 1 L. Lang, X. Liu, M. Hu and B. Zhang, *ChemCatChem*, 2009, **1**, 472-478.

- 2 H. Zhou, D. Korelskiy, E. Sjöberg and J. Hedlund, *Microporous Mesoporous Mater.*, 2014, **192**, 76-81.
- 3 M. Zhou, X. Liu, B. Zhang and H. Zhu, *Langmuir*, 2008, **24**, 11942-11946.
- 4 C. Wang, X. Liu, J. Li and B. Zhang, *CrystEngComm*, 2013, **15**, 6301-6304.
- 5 X. Liu, L. Xu, B. Zhang and X. Liu, *Microporous Mesoporous Mater.*, 2014, **193**, 127-133.
- 6 B. Zhang, C. Wang, L. Lang, R. Cui and X. Liu, *Adv. Funct. Mater.*, 2008, **18**, 3434-3443.
- 7 C. Wang, X. Liu, R. Cui and B. Zhang, *J. Membr. Sci.*, 2009, **330**, 259-266.
- 8 L. Lang, X. Liu and B. Zhang, *Appl. Surf. Sci.*, 2008, **254**, 2353-2358.
- 9 M. Kanezashi, J. O'Brien and Y. S. Lin, *J. Membr. Sci.*, 2006, **286**, 213-222.
- 10 W. Yang, B. Zhang and X. Liu, *Microporous Mesoporous Mater.*, 2009, **117**, 391-394.
